# Supplementary material for: Modulating the photodynamic modality of Au22 nanoclusters through surface conjugation of arginine for promoted healing of bacteria-infected wounds
Source: Royal Society of Chemistry journal article supplement (doi:10.1039/d4nr03278k), 2024-01-01
Supplement: d4nr03278k1.pdf [file d4nr03278k1.pdf]

## Supporting Information

### **Modulating the Photodynamic Modality of Au<sub>22</sub> Nanoclusters Through Surface Conjugation of Arginine for Promoted Healing of Bacteria-Infected Wound**

*Xinyue Dou<sup>\*a</sup>, Sariah Saalah<sup>a</sup>, Chel-Ken Chiam<sup>a</sup>, Jianping Xie<sup>\*b</sup>, and Coswald Stephen Sipaut<sup>\*a</sup>*

*<sup>a</sup>Chemical Engineering Programme, Faculty of Engineering, Universiti Malaysia Sabah, Kota Kinabalu 88400, Sabah, Malaysia*

*E-mail: jojoba2021@126.com (X.D.); css@ums.edu.my (C.S.S.)*

*<sup>b</sup>Department of Chemical and Biomolecular Engineering, National University of Singapore, 4 Engineering Drive 4, Singapore, 117585, Singapore*

*E-mail: chexiej@nus.edu.sg (J.X.)*

#### **1. Materials and methods**

##### **1.1 Chemical reagents, bacteria, and animals**

Chloroauric acid (HAuCl<sub>4</sub> ≥ 99.9 %), sodium hydroxide (NaOH, ≥ 96 %), ethanol (C<sub>2</sub>H<sub>5</sub>OH, ≥ 99.0 %), hydrochloric acid (HCl), arginine (Arg), cupric sulfate (CuSO<sub>4</sub>) and glutathione (GSH) were purchased from Sinopharm Chemical Reagent Co., Ltd. Sodium borohydride (NaBH<sub>4</sub>, ≥ 96 %) were purchased from Shanghai Shanpu Chemical Co., Ltd (China). Formalin solution was purchased from Merck. 1-(3-dimethylaminopropyl)-3-ethylcarbodiimide hydrochloride (EDC; ≥98%), vancomycin

(Van), N-hydroxysuccinimide (NHS;  $\geq 98\%$ ), 3-(4,5-dimethylthiazol-2-yl)-2,5-diphenyltetrazolium bromide (MTT),  $\text{Fe}^{2+}$ -(MGD)<sub>2</sub> (MGD: N-methyl-D-glucamine dithiocarbamate), dichlorodihydrofluorescein diacetate (DCFH-DA) dye, 2,9-dimethyl-1,10-phenanthroline (DMP), 5,5-dimethyl-1-pyrroline N-oxide (DMPO) and dimethyl sulfoxide (DMSO) were purchased from Sigma-Aldrich. Ultrapure water was used throughout the experiments.

Phosphate buffer solution (PBS) solution, Luria-Bertani (LB) nutrient agar, and LB broth were purchased from Qingdao Hope Bio-Technology Co., Ltd. A complete Dulbecco's modified Eagle medium (DMEM) was purchased from Beijing Solarbio Science & Technology Co., Ltd. Standard strains of *Staphylococcus aureus* ATCC 6538 (*S. aureus*) and *Escherichia coli* ATCC 25922 (*E. coli*) were purchased from China General Microbiological Culture Collection Center.

The animals were purchased from China Weitong Lihua Animal Co., LTD., and female ICR mice aged 6 weeks were selected. Animals were maintained under specific pathogen-free conditions and fed ad libitum. Animal experiments were conducted according to the international ethics guidelines and the National Institutes of Health Guide concerning the Care and Use of Laboratory Animals.

## **1.2 Instrumentation**

The size and morphology of samples were observed by transmission electron microscope (TEM, JEM-2100 Plus Electron Microscope). The optical properties of Au<sub>22</sub> NCs and Arg-Au<sub>22</sub> NCs and the turbidity of bacteria were measured by UV-vis absorption spectroscopy on a Shimadzu UV-1800 spectrometer. The

photoluminescence (PL) spectra of samples were acquired on a PerkinElmer LS-55 fluorescence spectrometer. The molecular formula of Au<sub>22</sub> NCs was analyzed on a Bruker Impact II (electrospray ionization mass spectrometry) ESI-MS system operating in negative ion mode. Zeta ( $\zeta$ ) potential tests were conducted on a Zetasizer Nano ZS (Malvern Co., England) system. The valance band (VB)-X-ray photoelectron spectra (VB-XPS) were obtained on an ESCALAB MK II Axis Ultra D1d system using Al K $\alpha$  as an exciting source. The PL decay profiles were gained on a transient photoluminescence spectrometer (FLS-1000, Edinburgh Instruments Ltd.). Hematoxylin/eosin (H&E) stained images were taken on an inverted fluorescence microscope (OLYMPUS IX73). Electronic paramagnetic resonance (EPR) spectra were recorded on an electron paramagnetic resonance spectrometer (EPR200-Plus, Guoyi Quantum (Hefei) Technology Co., LTD).

### **1.3 Reactive oxygen species (ROS) assay**

The H<sub>2</sub>O<sub>2</sub> concentration was determined using the DMP method, whereby a centrifuge tube containing 0.3 mL of DMP (ethanol, 10 mg/mL) and 0.3 mL of CuSO<sub>4</sub> (water, 0.01 mol/L) was used. Following this, 0.3 mL of the reaction solution was added to the tube. The mixture was then incubated for 10 min at room temperature with O<sub>2</sub> bubbled, after which the H<sub>2</sub>O<sub>2</sub> concentration was determined by measuring the absorbance of the supernatant liquid solutions at 454 nm.

### **1.4 Reactive nitrogen species (RNS) assay**

The RNS were measured by Electron Paramagnetic Resonance (EPR, EPR200-Plus). The trapping agent of RNS, Fe<sup>2+</sup>-(MGD)<sub>2</sub>, was used it right after it was ready. Fresh

solution of  $\text{Fe}^{2+}$ -(MGD)<sub>2</sub> was prepared by dissolving MGD and ferrous sulfate heptahydrate in deoxy deionized water and the final concentration was fixed to be 5 mM. Before EPR test, 0.1 mL  $\text{Fe}^{2+}$ -(MGD)<sub>2</sub> was added into 0.5 mL sample solution at dark or illumination for 10 min. EPR spectral simulation was conducted by the system equipped from the instrument.

### **1.5 Cytotoxicity assessment**

The *in vitro* cytotoxicity of pristine Au<sub>22</sub> NCs and Arg-Au<sub>22</sub> NCs was evaluated by a MTT assay. The L929 cells were selected as cell models. Firstly, the cells were seeded into a 96-well plate with a concentration of  $1 \times 10^4$  cells/well and cultured for 48 h. Subsequently, different concentrations of Au<sub>22</sub> NCs or Arg-Au<sub>22</sub> NCs were added to each well and incubated for 24 h at 37 °C. Afterwards, 20  $\mu\text{L}$  of MTT solution was added to each well and continued to incubate for 4 h at 37 °C. Finally, the absorbance of each well was measured at 460 nm by Tecan Spark® multimode microplate readers.

### **1.6 Animal experiments**

This study was performed in strict accordance with the NIH guidelines for the care and use of laboratory animals (NIH Publication No. 85–23 Rev. 1985) and was approved by the Biomedical Ethics Committee of Qingdao Zhong Hao Biological Engineering Co., Ltd. (Qingdao, China). The mice were randomly assigned to 6 groups according to the samples with 5 mice in each group: control (PBS), Light, Van, Au<sub>22</sub>-Light, Arg-Au<sub>22</sub> NCs and Arg-Au<sub>22</sub>-Light. The mice were anesthetized with isoflurane (2%) and removed back hair with a depilatory cream. A skin biopsy perforator (8 mm

in diameter) was used to create a full-thickness wound on the pasteurized dorsal skin. The wound sites were inoculated with *E. Coli* suspensions (100  $\mu\text{L}$ ,  $10^8$  CFU/mL), covered by 3M films, and left for 1 day to develop the severe infection. Subsequently, the infected wounds were treated with various photodynamic antibacterial agents (200  $\mu\text{L}$ ,  $1\text{ mg mL}^{-1}$ ). Afterwards, the infected wounds were irradiated by a commercial 300 W Xenon lamp with an optical cut-off filter ( $\lambda = 400\text{-}1100\text{ nm}$ ,  $100\text{ mW/cm}^2$ , CEL-HXF300, Beijing China Education AuLight Technology (CEAuLight) Co., Ltd.) for 5 min each day. After being treated for eleven days, all mice were sacrificed and the surrounding wound tissues were collected and fixed in paraformaldehyde (4%) for further H&E staining. Blood was collected and used to detect the levels of IL-6, IL-1 $\beta$ , and TNF- $\alpha$ .

### **1.7 Levels of inflammatory cytokines in blood homogenates for efficacy evaluation**

The security indexes of Arg-Au<sub>22</sub> NCs were tested using ELISA kits (Corning). Blood samples were obtained from the mice on the last day of experiment.

### **1.8 Histological analysis**

The collected skin tissue and organ samples were fixed for 48 h, then dehydrated and paraffin embedded. Paraffin sections with thickness of 5  $\mu\text{m}$  were prepared for histological analysis. Hematoxylin eosin (H&E) staining was used for observation.

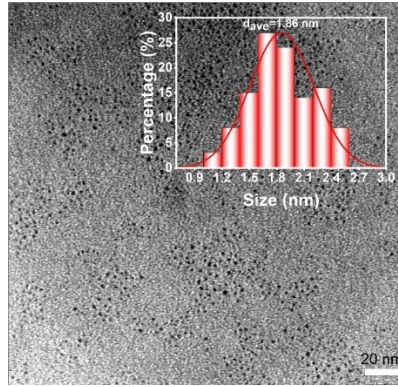

**Figure S1.** A representative TEM image and size distribution histogram (inset) of pristine Au<sub>22</sub> NCs.

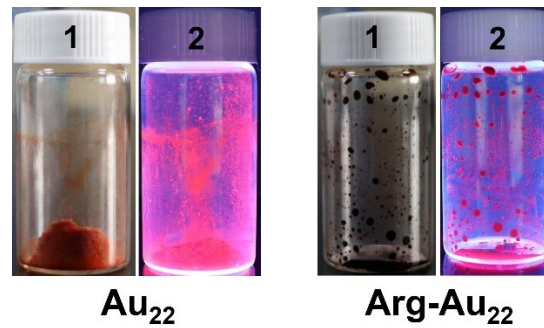

**Figure S2.** Digital photos of pristine Au<sub>22</sub> NCs and Arg-Au<sub>22</sub> NCs in solid state under visible (item #1) and UV (item #2) light illumination.

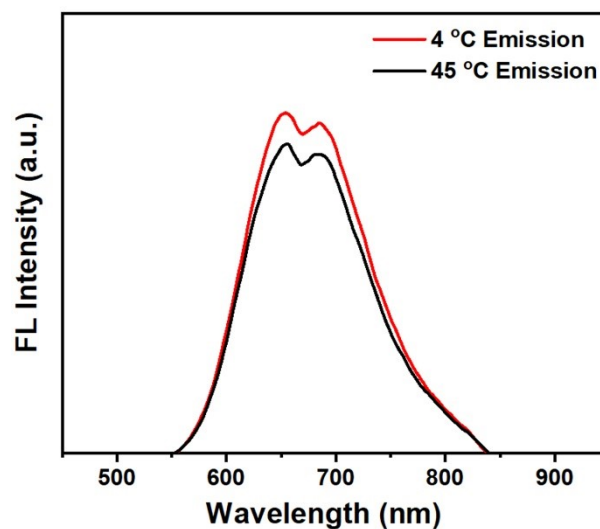

**Figure S3.** Photoemission spectra of the Arg-Au<sub>22</sub> NCs at 4 °C (red curve), and 45 °C (black curve).

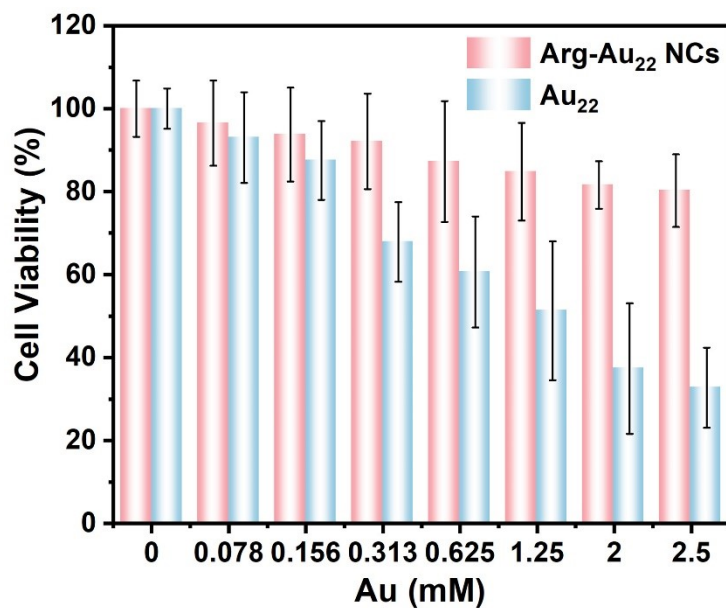

**Figure S4.** L929 Cell viability evaluated by MTT assay after 24 h treatment with different concentrations of Arg-Au<sub>22</sub> NCs and Au<sub>22</sub> NCs.

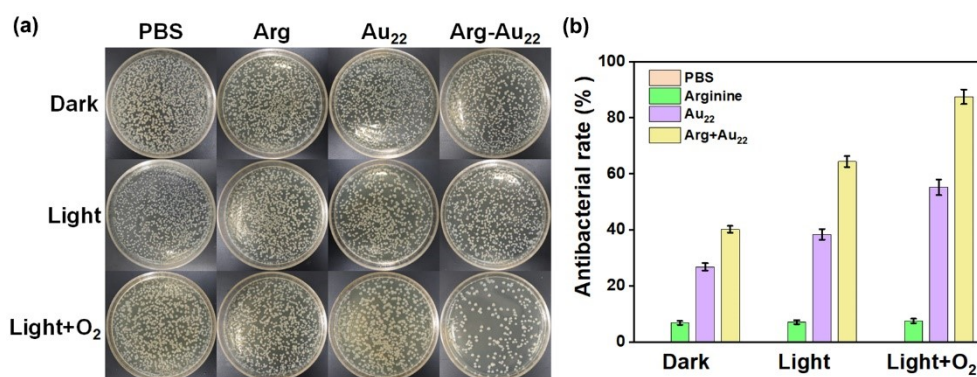

**Figure S5.** (a) Fungus colony growth of *Monilia albicans* treated with PBS, Arg, Au<sub>22</sub> NCs and Arg-Au<sub>22</sub> NCs under the conditions of dark, visible-light illumination in the air, visible-light illumination with O<sub>2</sub> bubbling. (b) Antifungal activities of different samples against *Monilia albicans*.

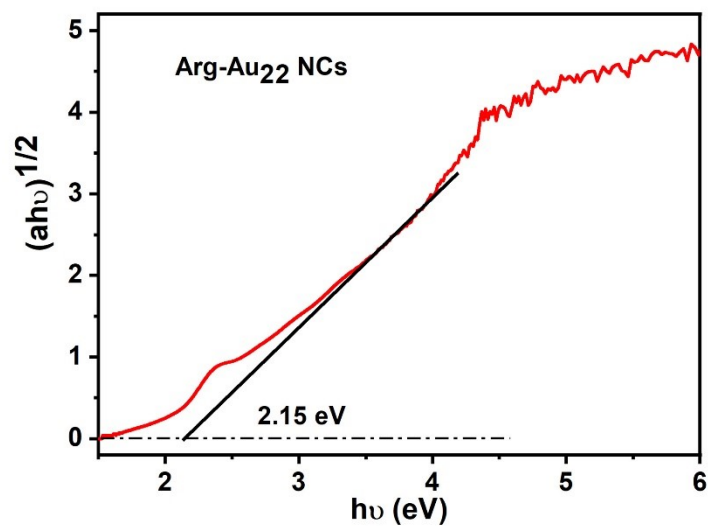

**Figure S6.** The Tauc plot of Arg-Au<sub>22</sub> NCs acquired based on their UV-vis absorption spectrum.

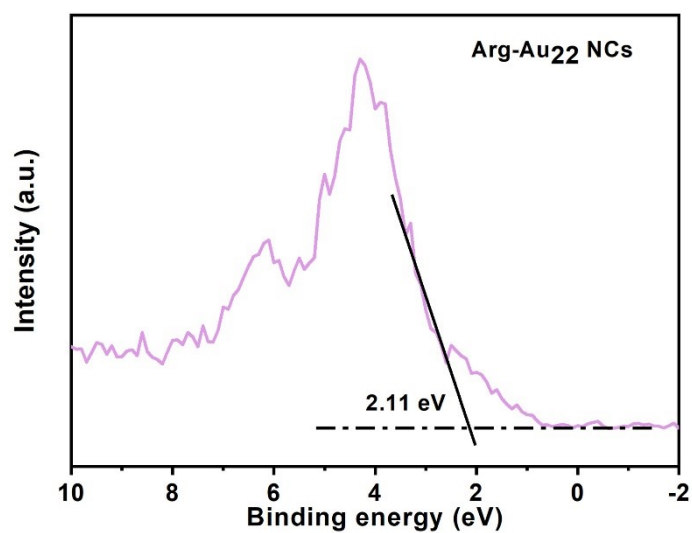

**Figure S7.** XPS of valence band (VB-XPS) of Arg-Au<sub>22</sub> NCs.



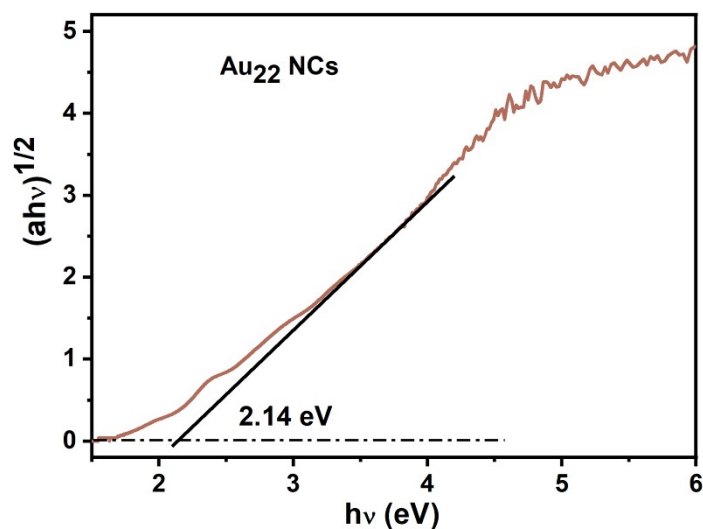

**Figure S8.** The Tauc plot of pristine Au<sub>22</sub> NCs acquired based on their UV-vis absorption spectrum.

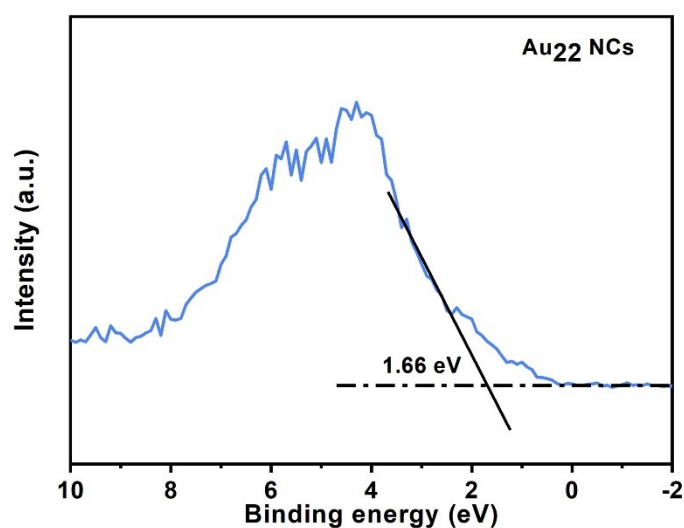

**Figure S9.** XPS of valence band (VB-XPS) of pristine Au<sub>22</sub> NCs.

### Supplementary Note I:

The VB-XPS (Figure S7 and S9) shows that the valence band (VB) of the Au<sub>22</sub> NCs and Arg-Au<sub>22</sub> NCs are respectively at 1.66 eV and 2.11 eV, which could be converted to 1.77 V and 2.22 V vs RHE based on the formula  $E_{\text{RHE}} = \varphi + E_{\text{VB-XPS}} - 4.44 \text{ eV}$  (RHE: reversible hydrogen electron,  $\varphi$ : work function, 4.55 eV). In addition, the Tauc plots

(Figure S6 and S8) of Au<sub>22</sub> NCs and Arg-Au<sub>22</sub> NCs were transformed from the Figure 1b, and the band gaps were gained about 2.14 eV for Au<sub>22</sub> NCs and 2.15 eV for Arg-Au<sub>22</sub> NCs. Therefore, the position of the CB of the Au<sub>22</sub> NCs and Arg-Au<sub>22</sub> NCs are determined to be - 0.37 V vs RHE and 0.07 V vs RHE, respectively. While the VB-CB band of pristine Au<sub>22</sub> NCs encompasses the potentials required for oxygen or H<sub>2</sub>O<sub>2</sub> reduction (O<sub>2</sub>/•O<sub>2</sub><sup>-</sup>, -0.33 V vs. RHE, pH=7; O<sub>2</sub>/H<sub>2</sub>O<sub>2</sub>, 0.28 V vs. RHE, pH=7; H<sub>2</sub>O<sub>2</sub>/•OH, 0.73 V vs. RHE, pH=7), that of Arg-Au<sub>22</sub> NCs make them incapable of producing •O<sub>2</sub><sup>-</sup> because of the lower potential for •O<sub>2</sub><sup>-</sup> generation. The corresponding reaction formula potentials, and conditions are displayed below.

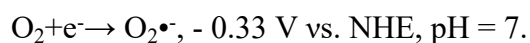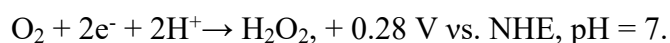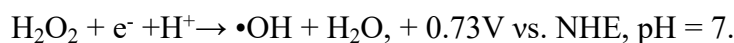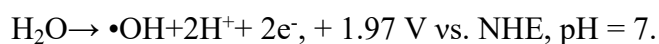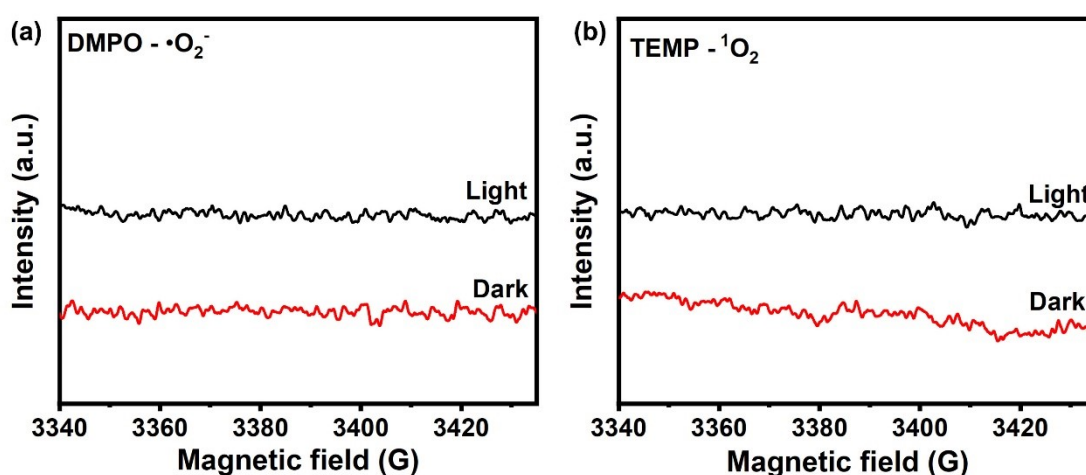

**Figure S10.** Electronic paramagnetic resonance (EPR) spectra of (a) •O<sub>2</sub><sup>-</sup> and (b) <sup>1</sup>O<sub>2</sub> of Arg-Au<sub>22</sub> NCs with or without visible light illumination.

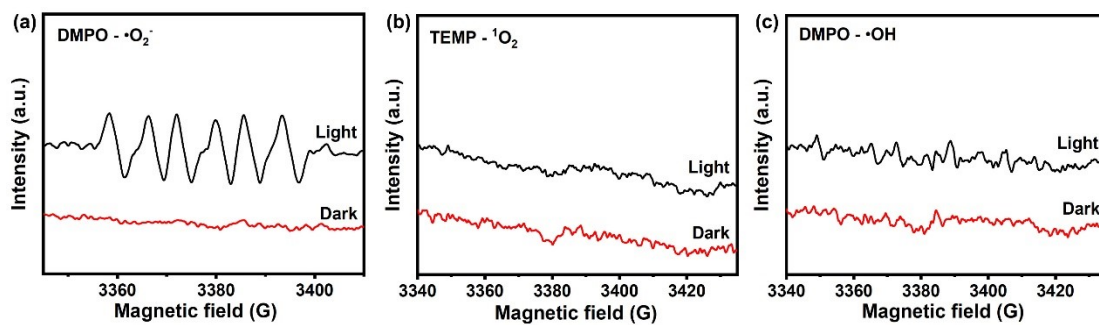

**Figure S11.** Electronic paramagnetic resonance (EPR) spectra of (a)  $\bullet\text{O}_2^-$ , (b)  $^1\text{O}_2$  and (c) of  $\bullet\text{OH}$  of pristine  $\text{Au}_{22}$  NCs with or without visible light illumination.

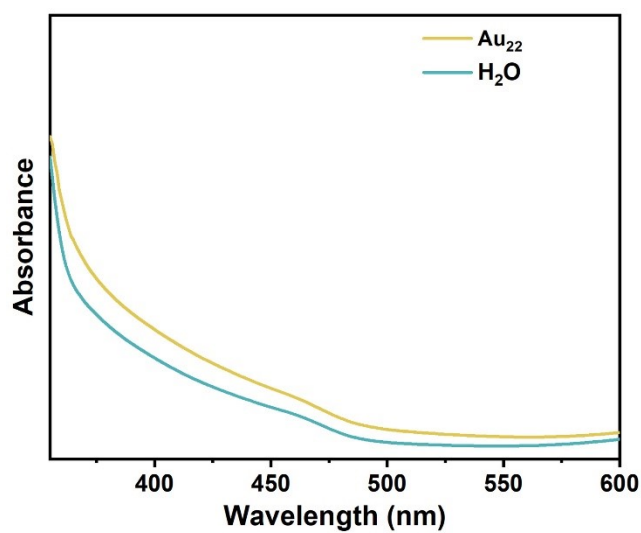

**Figure S12.** Photodynamic production of  $\text{H}_2\text{O}_2$  by pristine  $\text{Au}_{22}$  NCs under visible light illumination for 60 min.

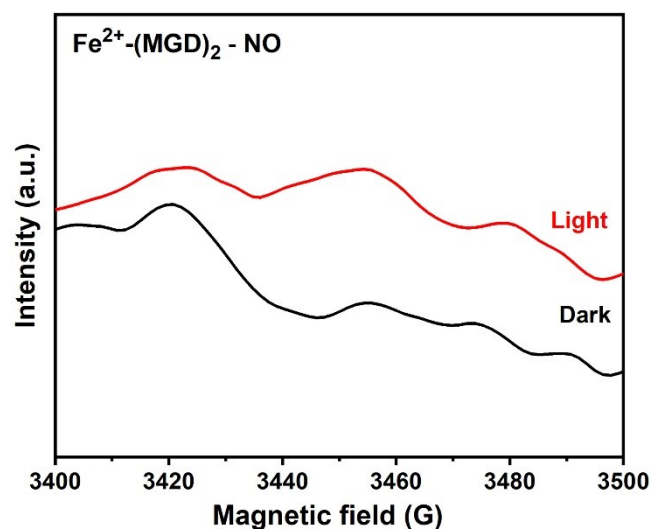

**Figure S13.** EPR spectra of NO of pristine Au<sub>22</sub> NCs with or without visible light illumination.

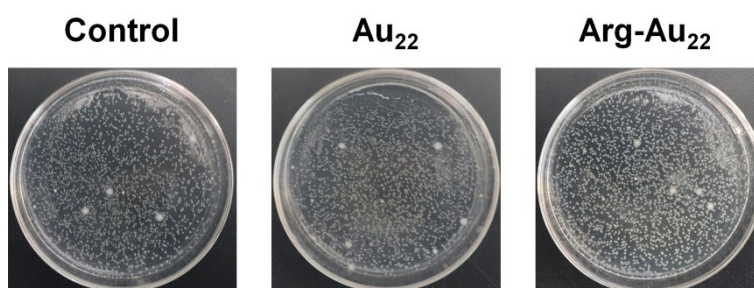

**Figure S14.** (a) Bacterial colony growth of *E. coli* treated with PBS (control), Au<sub>22</sub> NCs in the presence of ROS scavenger (DMPO), and Arg-Au<sub>22</sub> NCs in the presence of ROS scavenger (DMPO) under the condition of visible-light illumination and O<sub>2</sub> atmosphere for 1 h.

### Supplementary Note II:

In order to distinguish the specific antibacterial contributions of ROS, RNS, and intrinsic antibacterial Au species, a series of antibacterial tests were conducted on Arg-Au<sub>22</sub> NCs, pristine Au<sub>22</sub> NCs, and PBS as a control, under varying experimental

conditions. These conditions included darkness, visible light exposure in the presence of O<sub>2</sub> bubbling, with and without ROS scavenger DMPO (as illustrated in Figure S14 and Figure 2). Using Arg-Au<sub>22</sub> NCs as a case study, the antibacterial efficacy of Arg-Au<sub>22</sub> NCs in darkness and under O<sub>2</sub> bubbling was considered as the inherent antibacterial activity of the Arg-Au<sub>22</sub> species. Moreover, the antibacterial activity of Arg-Au<sub>22</sub> NCs subjected to light exposure and O<sub>2</sub> bubbling in the presence of DMPO was interpreted as the combined antibacterial effects of RNS and the inherent antibacterial activity of the Arg-Au<sub>22</sub> species. By comparing the antibacterial outcomes of Arg-Au<sub>22</sub> NCs under light exposure and O<sub>2</sub> bubbling with or without DMPO, the antibacterial contributions of ROS could be obtained. Of note, the antibacterial contribution of RNS calculated in this manner, is severely underestimated because the RNS is originated from the Arg oxidation by ROS and thus the DMPO-mediated ROS exhaustion made the Arg-oxidation-directed RNS production insufficient. Nevertheless, the Figure of the specific antibacterial contributions of ROS, RNS, and intrinsic antibacterial Au species could provide a general insight on the photodynamic antibacterial mechanism. Similarly, the specific antibacterial effects of ROS and intrinsic antibacterial Au species of pristine Au<sub>22</sub> NCs were quantified using analogous methodologies.
